# Supplementary material
Source: ML conference proceedings conference paper supplement (https://openreview.net/forum?id=8ixcRzGuff)
Supplement: supplementary_material [file summary_ANO.xlsx]

## Sheet: subdirs
inout	subdir	unique_ratio	nontrivial_ratio
in10_out10	and160	0.998	1
in10_out10	and80	0.997	1
in10_out10	and40	0.984	1
in20_out20_tt15	and160	0.942	1
in20_out20_tt15	and320	0.9335	1
in40_out40_tt15	and1280	0.933	1
in80_out80_tt15	and1280	0.9155	1
in5_out5	and40	0.898	1
in20_out20_tt15	and640	0.888	1
in40_out40_tt15	and640	0.877	1
in80_out80_tt15	and640	0.877	1
in80_out80_tt15	and2560	0.8758	1
in40_out40_tt15	and320	0.874	1
in5_out5	and20	0.862	1
in5_out5	and10	0.796	1

## Sheet: global
inout	avg_unique_across_subdirs	avg_full_across_subdirs	global_unique_ratio	global_nontrivial_ratio	total_vectors	total_files	unique_patterns	max_repeat_count	max_repeat_ratio	avg_repeat
in10_out10	0.993	1	0.99	1	3000	300	2970	4	0.0013	1.01
in20_out20_tt15	0.9212	1	0.9048	1	6000	300	5429	17	0.0028	1.11
in40_out40_tt15	0.8947	1	0.8568	1	10000	250	8568	13	0.0013	1.17
in5_out5	0.852	1	0.7507	1	1500	300	1126	8	0.0053	1.33
in80_out80_tt15	0.8894	1	0.8815	1	12000	150	10578	27	0.0022	1.13

## Sheet: subdirs_with_noise
noise	inout	subdir	unique_ratio	nontrivial_ratio
0	in10_out10	and160	0.993	1
0	in10_out10	and40	0.979	1
0	in10_out10	and80	0.996	1
0	in5_out5	and10	0.766	1
0	in5_out5	and20	0.868	1
0	in5_out5	and40	0.9	1
0.01	in10_out10	and160	1	1
0.01	in10_out10	and40	1	1
0.01	in10_out10	and80	1	1
0.01	in5_out5	and10	0.766	1
0.01	in5_out5	and20	0.868	1
0.01	in5_out5	and40	0.9	1
0.05	in10_out10	and160	1	1
0.05	in10_out10	and40	1	1
0.05	in10_out10	and80	1	1
0.05	in5_out5	and10	0.982	1
0.05	in5_out5	and20	0.984	1
0.05	in5_out5	and40	0.996	0.996

## Sheet: global_by_noise
noise	inout	avg_unique_across_subdirs	avg_full_across_subdirs	global_unique_ratio	global_nontrivial_ratio	total_vectors	total_files	unique_patterns	max_repeat_count	max_repeat_ratio	avg_repeat
0	in10_out10	0.9893	1	0.9877	1	3000	300	2963	3	0.001	1.01
0	in5_out5	0.8447	1	0.744	1	1500	300	1116	7	0.0047	1.34
0.01	in10_out10	1	1	1	1	3000	300	3000	1	0.0003	1
0.01	in5_out5	0.8447	1	0.744	1	1500	300	1116	7	0.0047	1.34
0.05	in10_out10	1	1	1	1	3000	300	3000	1	0.0003	1
0.05	in5_out5	0.9873	0.9987	0.9773	0.9987	1500	300	1468	3	0.002	1.02
